# Supplementary material for: Adriamycin coated silica microspheres as labels for cancer biomarker alpha-fetoprotein detection
Source: Royal Society of Chemistry journal article supplement (doi:10.1039/d1ay00655j), 2021-01-01
Supplement: d1ay00655j1.pdf [file d1ay00655j1.pdf]

# Adriamycin coated silica microsphere as labels for cancer biomarker alpha-fetoprotein detection

Wenwen Meng Mengrao Li Yuzhong Zhang\*

(College of Chemistry and Materials Science, Anhui Key Laboratory of Chem-Biosensing, Anhui

Normal University, Wuhu 241002, People's Republic of China)

---

\* Corresponding author. Tel: +86 553 3869303; Fax: +86 553 3869303

E-mail address: [zhyz65@mail.ahnu.edu.cn](mailto:zhyz65@mail.ahnu.edu.cn) (Y. Zhang)

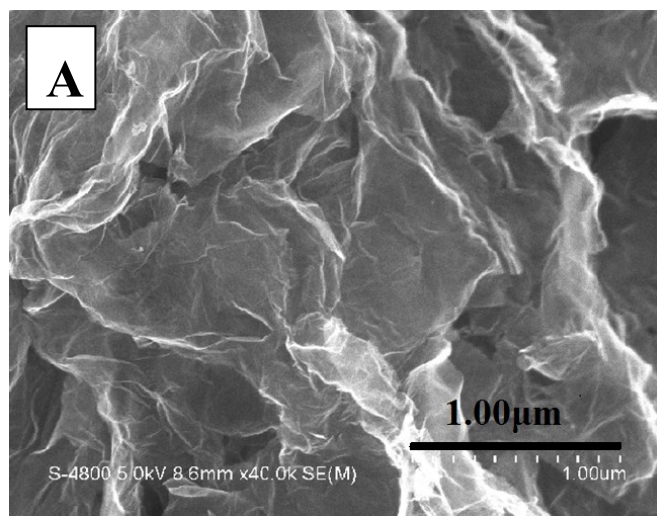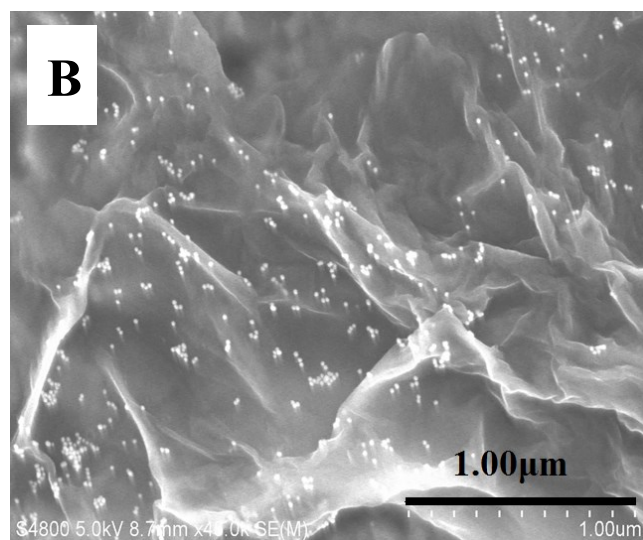

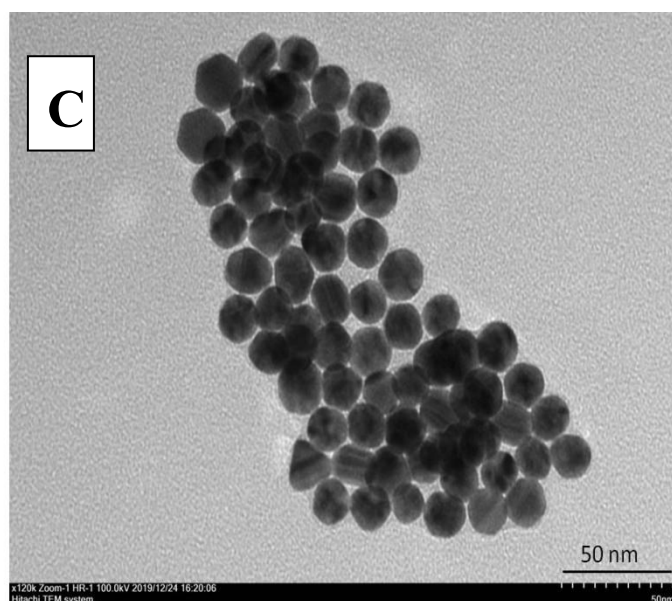

Fig. S1 SEM image of rGO (A) and Au NPs-rGO nanocomposites (B) ; TEM of Au NPs (C)

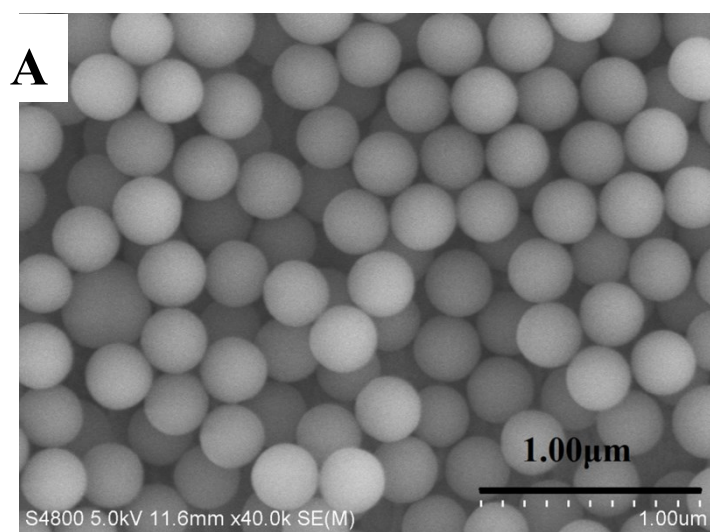

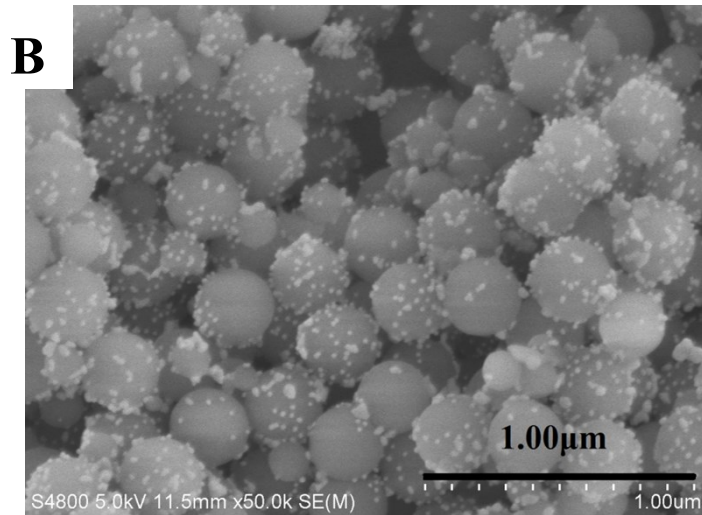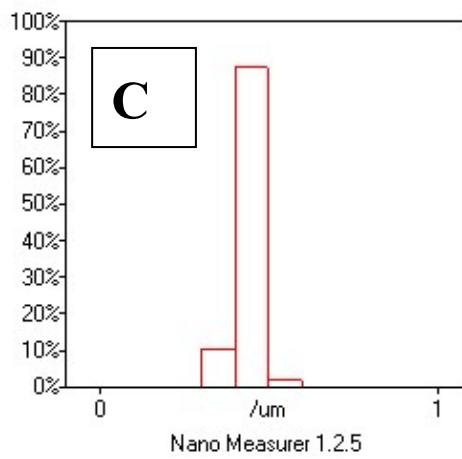

Fig .S2 SEM of SiO<sub>2</sub> (A) ,SiO<sub>2</sub>-Au NPs composites (B) and histogram of SiO<sub>2</sub> diameter

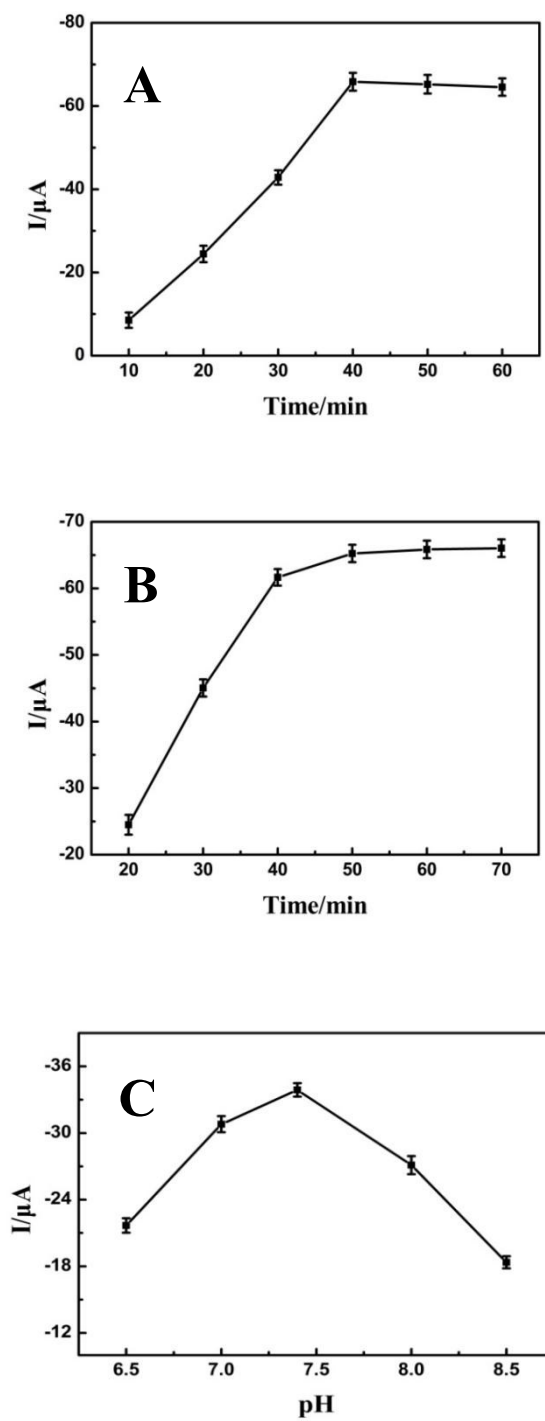

Fig.S3. Optimization of experimental conditions:(A) Incubation time between Ab<sub>1</sub> and antigen; (B) Incubation time of antigen and Ab<sub>2</sub>/ADM/Au NPs @SiO<sub>2</sub> labels; C<sub>AFP</sub> = 75 ng mL<sup>-1</sup>. (C) pH values, C<sub>AFP</sub> = 0.05 ng mL<sup>-1</sup>

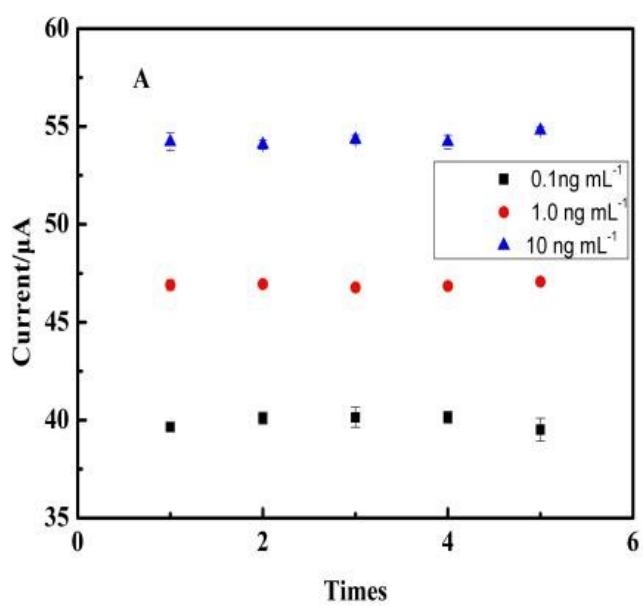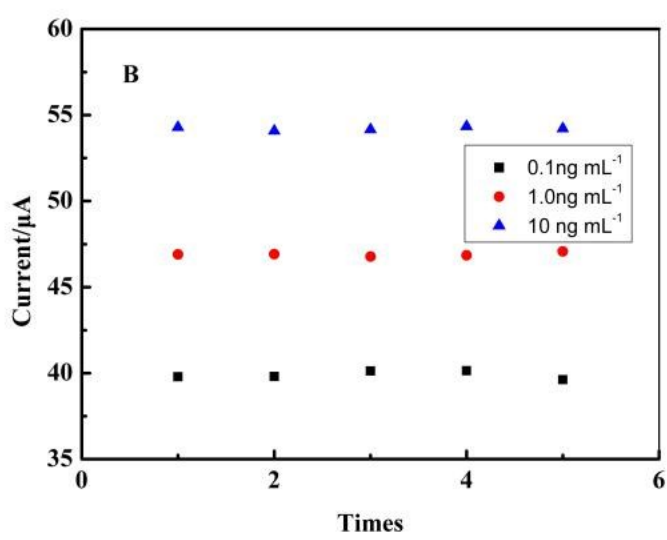

Fig.S4. Reproducibility of immunoassay

A- intra -assay (the same batches electrodes) B inter-assay ( different batches electrode)

**Table.S1.** Analytical performance of several electrochemical immunosensors of AFP

|                                                                         | Line arrange (ng mL <sup>-1</sup> ) | Detection limit (ng mL <sup>-1</sup> ) | References |
|-------------------------------------------------------------------------|-------------------------------------|----------------------------------------|------------|
| Glucose oxidase functionalized nanocomposites                           | $2.5 \times 10^{-3} - 25$           | $2.2 \times 10^{-3}$                   | [10]       |
| Graphene sheets and multienzyme functionalized carbon nanospheres       | 0.05 - 6                            | 0.02                                   | [11]       |
| HCR amplification signal                                                | $5.0 \times 10^{-3} - 50$           | $2.5 \times 10^{-4}$                   | [14]       |
| Conductive carbon nanoparticles labeled enzyme-linked antibodies        | 0.02 - 4                            | 0.01                                   | [22]       |
| Carbon nanotube/manganese dioxide                                       | 0.2 -100                            | 0.04                                   | [23]       |
| Horseradish peroxidase functionalized gold nanorods as a label          | 0.1-100                             | 0.03                                   | [24]       |
| Functionalized polypyrrole microspheres nanocomposites as a trace label | $1.0 \times 10^{-3} - 50$           | $3.3 \times 10^{-4}$                   | [25]       |
| ADM functionalized Si as label                                          | $5.0 \times 10^{-3} - 75$           | $1.7 \times 10^{-4}$                   | This work  |
